# Supplementary material for: Blood Group Antigen Recognition via the Group A Streptococcal M Protein Mediates Host Colonization
Source: PubMed Central journal article supplement (PMC5263248; doi:10.1128/mbio.02237-16), 2017-01-24
Supplement: mbo002173156sf2.pdf [file mbo002173156sf2.pdf]

## Supplementary Figure 2

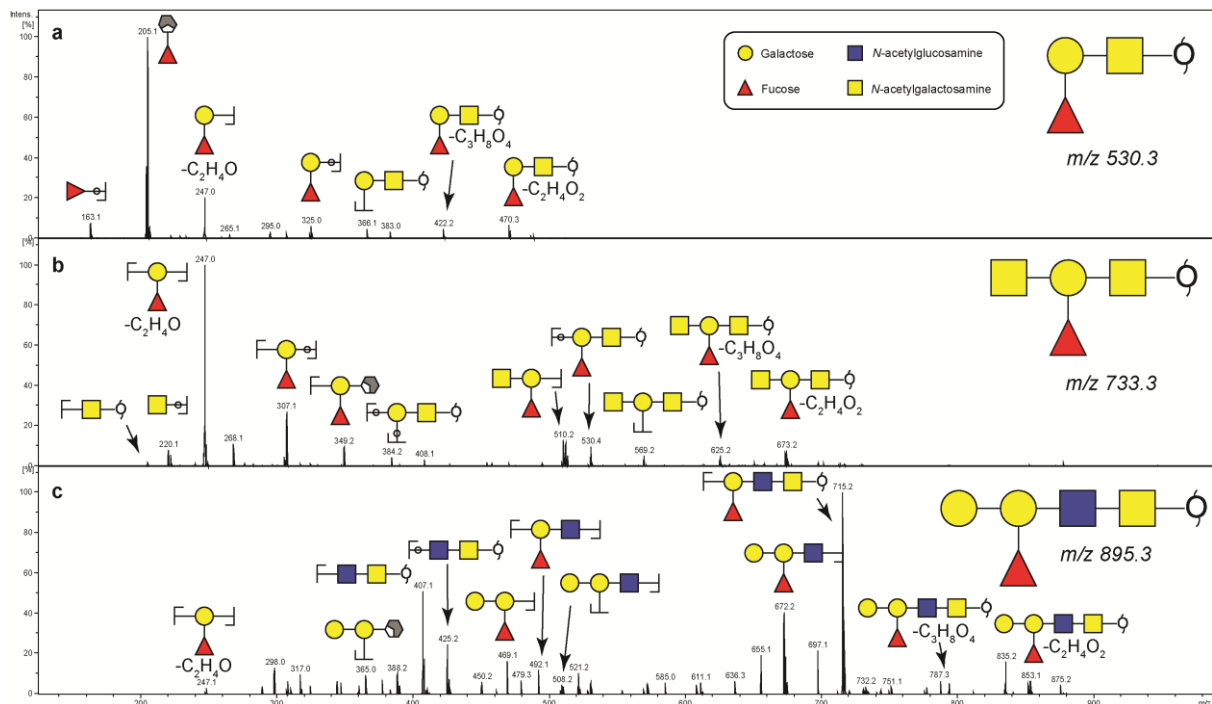

**Supplementary Figure 2: Representative mass spectra of *O*-glycans released from salivary glycoproteins proteins.** Collision-induced dissociation–MS/MS fragment spectra of singly charged negative ion of three *O*-linked glycan structures from saliva at (a)  $m/z$  530.3<sup>1-</sup>, (b)  $m/z$  733.3<sup>1-</sup> and (c)  $m/z$  895.3<sup>1-</sup>. The fragmentation spectra of these unique glycan species represented here were used to identify secretor and ABO(H) blood group status. For example, the structure with  $m/z$  530.3<sup>1-</sup> is indicative of an H-antigen and was observed to be present only in secretor individuals. Similarly, the fragmentation spectra of  $m/z$  733.3<sup>1-</sup> show an *O*-glycan structure with blood group A epitope and  $m/z$  895.3<sup>1-</sup> with blood group B epitope.
