# Supplementary material for: Blood Group Antigen Recognition via the Group A Streptococcal M Protein Mediates Host Colonization
Source: PubMed Central journal article supplement (PMC5263248; doi:10.1128/mbio.02237-16), 2017-01-24
Supplement: mbo002173156sf4.pdf [file mbo002173156sf4.pdf]

## Supplementary Figure 4

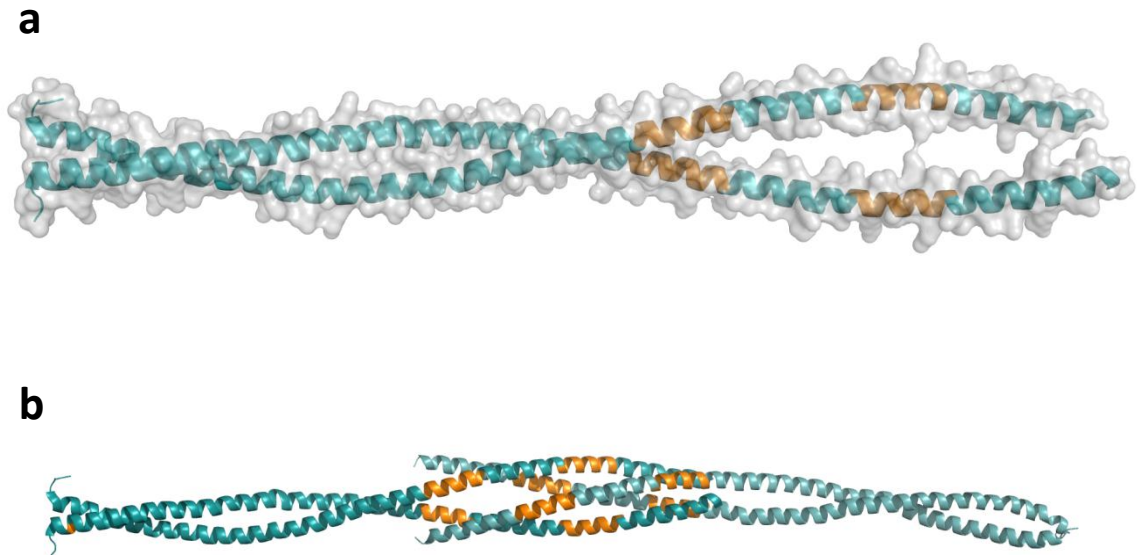

**Supplementary Figure 4.** (a) Crystal structure of the dimeric AB fragment of M1 (Protein Data Bank ID 2OTO [20]). (b) Antiparallel coiled-coil interactions between two M1AB dimers (dark and light teal) in the crystal. The minimal motif shown to bind LNT and H-antigen type 1 is highlighted in orange. The structures are shown in cartoon representation as well as surface representation in (a). The figure was prepared using PyMol (Schrödinger, LLC).
